# Supplementary material
Source: PubMed Central journal article supplement (PMC4462338)
Supplement: supp_kwv027_kwv027supp.pdf [file supp_kwv027_kwv027supp.pdf]

**Web Table 1.** Lactation history in relation to 4-year weight gain (uniparous women only) in the Black Women's Health Study, 1995–2011

|                                                | <i>N</i> | Unadjusted Mean Weight Gain (kg) | Unadjusted Mean Difference in Weight Gain (kg) | Multivariable Mean Difference in Weight Gain (kg) <sup>a</sup> | 95% CI       | <i>P</i> trend |
|------------------------------------------------|----------|----------------------------------|------------------------------------------------|----------------------------------------------------------------|--------------|----------------|
| <b>Ever lactation</b>                          |          |                                  |                                                |                                                                |              |                |
| No                                             | 475      | 5.85                             | Reference                                      | Reference                                                      |              |                |
| Yes                                            | 1296     | 5.64                             | -0.21                                          | -0.004                                                         | -0.77, 0.76  |                |
| <b>Lactation duration</b>                      |          |                                  |                                                |                                                                |              |                |
| <3 months                                      | 318      | 5.63                             | -0.22                                          | -0.22                                                          | -1.24, 0.79  |                |
| 3-5 months                                     | 304      | 5.88                             | 0.03                                           | 0.17                                                           | -0.86, 1.20  |                |
| 6-11 months                                    | 450      | 5.95                             | 0.10                                           | 0.34                                                           | -0.59, 1.27  |                |
| ≥12 months                                     | 224      | 4.71                             | -1.14                                          | -0.65                                                          | -1.81, 0.51  | 0.89           |
| <b>Age &lt;30 at time of birth<sup>b</sup></b> |          |                                  |                                                |                                                                |              |                |
| No                                             | 104      | 8.05                             | Reference                                      | Reference                                                      |              |                |
| Yes                                            | 294      | 6.73                             | -1.32                                          | -1.07                                                          | -2.84, 0.69  |                |
| <b>Lactation duration</b>                      |          |                                  |                                                |                                                                |              |                |
| <3 months                                      | 78       | 6.20                             | -1.85                                          | -1.71                                                          | -4.00, 0.57  |                |
| 3-5 months                                     | 72       | 6.46                             | -1.59                                          | -1.52                                                          | -3.88, 0.84  |                |
| 6-11 months                                    | 105      | 7.39                             | -0.66                                          | -0.24                                                          | -2.37, 1.89  |                |
| ≥12 months                                     | 39       | 6.53                             | -1.52                                          | -1.11                                                          | -4.02, 1.81  | 0.82           |
| <b>Age ≥30 at time of birth<sup>b</sup></b>    |          |                                  |                                                |                                                                |              |                |
| No                                             | 371      | 5.23                             | Reference                                      | Reference                                                      |              |                |
| Yes                                            | 1002     | 5.32                             | 0.09                                           | 0.28                                                           | -0.57, 1.13  |                |
| <b>Lactation duration</b>                      |          |                                  |                                                |                                                                |              |                |
| <3 months                                      | 240      | 5.44                             | 0.21                                           | 0.25                                                           | -0.89, 1.38  |                |
| 3-5 months                                     | 232      | 5.70                             | 0.47                                           | 0.61                                                           | -0.55, 1.76  |                |
| 6-11 months                                    | 345      | 5.51                             | 0.28                                           | 0.51                                                           | -0.53, 1.54  |                |
| ≥12 months                                     | 185      | 4.33                             | -0.90                                          | -0.57                                                          | -1.83, 0.70  | 0.93           |
| <b>Prepregnancy BMI &lt;30<sup>c</sup></b>     |          |                                  |                                                |                                                                |              |                |
| No                                             | 346      | 6.34                             | Reference                                      | Reference                                                      |              |                |
| Yes                                            | 1002     | 5.65                             | -0.69                                          | -0.53                                                          | -1.34, 0.28  |                |
| <b>Lactation duration</b>                      |          |                                  |                                                |                                                                |              |                |
| <3 months                                      | 221      | 6.03                             | -0.31                                          | -0.37                                                          | -1.48, 0.73  |                |
| 3-5 months                                     | 226      | 6.13                             | -0.21                                          | -0.09                                                          | -1.19, 1.01  |                |
| 6-11 months                                    | 372      | 5.91                             | -0.43                                          | -0.23                                                          | -1.20, 0.73  |                |
| ≥12 months                                     | 183      | 4.09                             | -2.25                                          | -1.93                                                          | -3.12, -0.75 | 0.02           |
| <b>Prepregnancy BMI ≥30<sup>c</sup></b>        |          |                                  |                                                |                                                                |              |                |
| No                                             | 128      | 4.55                             | Reference                                      | Reference                                                      |              |                |
| Yes                                            | 291      | 5.65                             | 1.10                                           | 1.29                                                           | -0.65, 3.22  |                |
| <b>Lactation duration</b>                      |          |                                  |                                                |                                                                |              |                |
| <3 months                                      | 96       | 4.69                             | 0.14                                           | 0.13                                                           | -2.30, 2.56  |                |
| 3-5 months                                     | 78       | 5.15                             | 0.60                                           | 0.90                                                           | -1.67, 3.47  |                |
| 6-11 months                                    | 76       | 6.39                             | 1.84                                           | 1.89                                                           | -0.68, 4.46  |                |
| ≥12 months                                     | 41       | 7.50                             | 2.95                                           | 3.94                                                           | 0.63, 7.25   | 0.01           |

<sup>a</sup> Adjusted for age, gestational weight gain, preterm birth, vigorous physical activity, dietary pattern, and years of education.

<sup>b</sup> *P* for interaction by age at time of birth = 0.66.

<sup>c</sup> *P* for interaction by prepregnancy BMI < 0.01.

BMI = body mass index; CI = confidence interval.

**Web Table 2.** Lactation history in relation to 8-year weight gain (uniparous women only) in the Black Women's Health Study, 1995–2011

|                                                | <i>N</i> | Unadjusted Mean Weight Gain (kg) | Unadjusted Mean Difference in Weight Gain (kg) | Multivariable Mean Difference in Weight Gain (kg) <sup>a</sup> | 95% CI       | <i>P</i> trend |
|------------------------------------------------|----------|----------------------------------|------------------------------------------------|----------------------------------------------------------------|--------------|----------------|
| <b>Ever lactation</b>                          |          |                                  |                                                |                                                                |              |                |
| No                                             | 403      | 7.74                             | Reference                                      | Reference                                                      |              |                |
| Yes                                            | 1083     | 8.10                             | 0.36                                           | 0.62                                                           | -0.40, 1.64  |                |
| <b>Lactation duration</b>                      |          |                                  |                                                |                                                                |              |                |
| <3 months                                      | 279      | 8.55                             | 0.81                                           | 0.91                                                           | -0.43, 2.25  |                |
| 3-5 months                                     | 251      | 7.93                             | 0.19                                           | 0.41                                                           | -0.98, 1.80  |                |
| 6-11 months                                    | 394      | 8.15                             | 0.41                                           | 0.68                                                           | -0.56, 1.92  |                |
| ≥12 months                                     | 159      | 7.46                             | -0.28                                          | 0.24                                                           | -1.40, 1.89  | 0.59           |
| <b>Age &lt;30 at time of birth<sup>b</sup></b> |          |                                  |                                                |                                                                |              |                |
| No                                             | 117      | 10.53                            | Reference                                      | Reference                                                      |              |                |
| Yes                                            | 306      | 9.35                             | -1.18                                          | -1.34                                                          | -3.40, 0.73  |                |
| <b>Lactation duration</b>                      |          |                                  |                                                |                                                                |              |                |
| <3 months                                      | 80       | 10.19                            | -0.34                                          | -0.67                                                          | -3.41, 2.06  |                |
| 3-5 months                                     | 78       | 9.36                             | -1.17                                          | -1.16                                                          | -3.89, 1.57  |                |
| 6-11 months                                    | 109      | 9.50                             | -1.03                                          | -1.37                                                          | -3.90, 1.16  |                |
| ≥12 months                                     | 39       | 7.21                             | -3.32                                          | -2.99                                                          | -6.47, 0.49  | 0.09           |
| <b>Age ≥30 at time of birth<sup>b</sup></b>    |          |                                  |                                                |                                                                |              |                |
| No                                             | 286      | 6.60                             | Reference                                      | Reference                                                      |              |                |
| Yes                                            | 777      | 7.61                             | 1.01                                           | 1.38                                                           | 0.21, 2.54   |                |
| <b>Lactation duration</b>                      |          |                                  |                                                |                                                                |              |                |
| <3 months                                      | 199      | 7.89                             | 1.29                                           | 1.65                                                           | 0.11, 3.18   |                |
| 3-5 months                                     | 173      | 7.29                             | 0.69                                           | 1.04                                                           | -0.57, 2.65  |                |
| 6-11 months                                    | 285      | 7.63                             | 1.03                                           | 1.41                                                           | -0.002, 2.82 |                |
| ≥12 months                                     | 120      | 7.54                             | 0.94                                           | 1.32                                                           | -0.54, 3.17  | 0.11           |
| <b>Prepregnancy BMI &lt;30<sup>c</sup></b>     |          |                                  |                                                |                                                                |              |                |
| No                                             | 291      | 8.88                             | Reference                                      | Reference                                                      |              |                |
| Yes                                            | 848      | 8.04                             | -0.84                                          | -0.59                                                          | -1.68, 0.49  |                |
| <b>Lactation duration</b>                      |          |                                  |                                                |                                                                |              |                |
| <3 months                                      | 193      | 8.57                             | -0.31                                          | -0.15                                                          | -1.61, 1.31  |                |
| 3-5 months                                     | 196      | 8.61                             | -0.27                                          | -0.03                                                          | -1.49, 1.44  |                |
| 6-11 months                                    | 329      | 7.94                             | -0.94                                          | -0.78                                                          | -2.07, 0.50  |                |
| ≥12 months                                     | 130      | 6.66                             | -2.22                                          | -1.71                                                          | -3.40, -0.03 | 0.05           |
| <b>Prepregnancy BMI ≥30<sup>c</sup></b>        |          |                                  |                                                |                                                                |              |                |
| No                                             | 110      | 4.51                             | Reference                                      | Reference                                                      |              |                |
| Yes                                            | 232      | 8.27                             | 3.76                                           | 3.93                                                           | 1.39, 6.47   |                |
| <b>Lactation duration</b>                      |          |                                  |                                                |                                                                |              |                |
| <3 months                                      | 85       | 8.41                             | 3.90                                           | 3.88                                                           | 0.76, 7.00   |                |
| 3-5 months                                     | 55       | 5.54                             | 1.03                                           | 1.64                                                           | -1.92, 5.21  |                |
| 6-11 months                                    | 64       | 9.20                             | 4.69                                           | 4.90                                                           | 1.52, 8.29   |                |
| ≥12 months                                     | 28       | 11.04                            | 6.53                                           | 7.04                                                           | 2.33, 11.75  | <0.01          |

<sup>a</sup> Adjusted for age, gestational weight gain, preterm birth, vigorous physical activity, dietary pattern, and years of education.

<sup>b</sup> *P* for interaction by age at time of birth = 0.59.

<sup>c</sup> *P* for interaction by prepregnancy BMI < 0.01.

BMI = body mass index; CI = confidence interval.
